# Supplementary material
Source: PubMed Central journal article supplement (PMC7160416)
Supplement: ONCO-25-e668-s001.pdf [file ONCO-25-e668-s001.pdf]

Supplemental Tables for:

Efficacy of second-line chemotherapy in patients with previously treated advanced thymic carcinoma: a retrospective analysis of 191 patients from NEJ023 Study.

Tateishi et al.

Table S1. Patient characteristics according to second-line chemotherapy regimen.

|                      | Platinum doublet<br>(n = 110)<br><i>n</i> (%) | Other multi-drug chemotherapy<br>(n = 26)<br><i>n</i> (%) | Monotherapy<br>(n = 55)<br><i>n</i> (%) | <i>p</i> |
|----------------------|-----------------------------------------------|-----------------------------------------------------------|-----------------------------------------|----------|
| Age median (range)   | 58.5 (16–79)                                  | 61.5 (22–78)                                              | 62 (13–83)                              | 0.844    |
| Sex                  |                                               |                                                           |                                         | 0.541    |
| Male                 | 77 (70.0)                                     | 21 (80.8)                                                 | 39 (70.9)                               |          |
| Female               | 33 (30.0)                                     | 5 (19.2)                                                  | 16 (29.1)                               |          |
| ECOG PS              |                                               |                                                           |                                         | 0.360    |
| 0-1                  | 100 (90.9)                                    | 24 (92.3)                                                 | 49 (89.1)                               |          |
| 2-3                  | 7 (6.4)                                       | 2 (7.7)                                                   | 5 (9.1)                                 |          |
| Unknown              | 3 (2.7)                                       | 0 (0.0)                                                   | 1 (1.8)                                 |          |
| Smoking status       |                                               |                                                           |                                         | 0.130    |
| Never                | 35 (31.8)                                     | 7 (26.9)                                                  | 22 (40.0)                               |          |
| Former/current       | 75 (68.2)                                     | 19 (73.1)                                                 | 31 (56.4)                               |          |
| Unknown              | 0 (0.0)                                       | 0 (1.0)                                                   | 2 (3.6)                                 |          |
| Histology            |                                               |                                                           |                                         | 0.376    |
| SQC                  | 80 (72.7)                                     | 18 (69.2)                                                 | 37 (67.3)                               |          |
| NEC                  | 9 (8.2)                                       | 5 (19.2)                                                  | 9 (16.4)                                |          |
| Other                | 21 (19.1)                                     | 3 (11.5)                                                  | 9 (16.4)                                |          |
| Masaoka-Koga staging |                                               |                                                           |                                         | 0.562    |
| Stage III            | 4 (3.6)                                       | 0 (0.0)                                                   | 2 (3.6)                                 |          |

Supplemental Tables for:

Efficacy of second-line chemotherapy in patients with previously treated advanced thymic carcinoma: a retrospective analysis of 191 patients from NEJ023 Study. Tateishi et al.

|                                 |           |           |           |       |
|---------------------------------|-----------|-----------|-----------|-------|
| Stage IVa                       | 33 (30.0) | 6 (23.1)  | 15 (27.3) |       |
| Stage IVb                       | 50 (45.5) | 17 (65.4) | 28 (50.9) |       |
| Postoperative recurrence        | 23 (20.9) | 3 (11.5)  | 10 (18.2) |       |
| WHO TNM staging                 |           |           |           | 0.403 |
| Stage III                       | 2 (1.8)   | 0 (0.0)   | 3 (5.5)   |       |
| Stage IV                        | 85 (77.3) | 23 (88.5) | 42 (76.4) |       |
| Postoperative recurrence        | 23 (20.9) | 3 (11.5)  | 10 (18.2) |       |
| First-line chemotherapy regimen |           |           |           | 0.001 |
| Platinum doublet                | 56 (50.9) | 18 (69.2) | 40 (72.7) |       |
| Other multi-drug chemotherapy   | 53 (48.2) | 8 (30.8)  | 11 (20.0) |       |
| Monotherapy                     | 1 (0.9)   | 0 (0.0)   | 4 (7.3)   |       |

---

Abbreviations: ECOG; Eastern Cooperative Oncology Group, PS; performance status, SQC; squamous cell carcinoma, NEC; neuroendocrine carcinoma, WHO; World Health Organization

Supplemental Tables for:

Efficacy of second-line chemotherapy in patients with previously treated advanced thymic carcinoma: a retrospective analysis of 191 patients from NEJ023 Study.

Tateishi et al.

Table S2. Relationship between first-line and second-line chemotherapy

| First-line  | n    | RR (%)            | Interval (range; months)* | Second-line            | n  | RR (%) |
|-------------|------|-------------------|---------------------------|------------------------|----|--------|
| CBDCA+PTX   | 47   | 35.9              | 2.9 (0.2 - 35.5)          | All                    | 47 | 11.9   |
|             | 8    | 42.6              |                           | CBDCA+PTX              | 8  | 28.6   |
|             | 8    | 25.0              |                           | DTX                    | 8  | 0      |
|             | 6    | 40.0              |                           | ADOC                   | 6  | 0      |
|             | 6    | 60.0              |                           | S-1                    | 6  | 16.7   |
|             | 5    | 20.0              |                           | AMR                    | 5  | 0      |
|             | 2    | 50.0              |                           | CDDP+VP-16             | 2  | 50.0   |
|             | 1    | 0                 |                           | CDDP+CPT-11            | 1  | 0      |
|             | 7    | 25.0              |                           | Other platinum doublet | 7  | 16.7   |
|             | 1    | 0                 |                           | Other multi-drug       | 1  | 0      |
| 3           | 33.3 | Other monotherapy | 3                         | 33.3                   |    |        |
| CDDP+VP-16  | 16   | 56.3              | 2.5 (0.9 - 25.4)          | All                    | 16 | 21.4   |
|             | 6    | 33.3              |                           | ADOC                   | 6  | 33.3   |
|             | 3    | 66.7              |                           | CBDCA+PTX              | 3  | 33.3   |
|             | 2    | 100               |                           | CDDP+VP-16             | 2  | 0      |
|             | 1    | 0                 |                           | AMR                    | 1  | 100    |
|             | 3    | 100               |                           | Other platinum doublet | 3  | 33.3   |
|             | 1    | 0                 |                           | Other monotherapy      | 1  | 0      |
|             | 1    | 0                 |                           |                        |    |        |
| CBDCA+VP-16 | 12   | 27.3              | 5.4 (1.1 - 13.1)          | All                    | 12 | 30.0   |
|             | 4    | 50.0              |                           | CBDCA+PTX              | 4  | 50.0   |

Supplemental Tables for:

Efficacy of second-line chemotherapy in patients with previously treated advanced thymic carcinoma: a retrospective analysis of 191 patients from NEJ023 Study.

Tateishi et al.

|                        |    |      |                   |                        |    |      |
|------------------------|----|------|-------------------|------------------------|----|------|
|                        | 1  | 0    |                   | ADOC                   | 1  | 0    |
|                        | 1  | 0    |                   | AMR                    | 1  | 0    |
|                        | 1  | 0    |                   | DTX                    | 1  | 0    |
|                        | 4  | 33.3 |                   | Other platinum doublet | 4  | 33.3 |
|                        | 1  | 0    |                   | Other multi-drug       | 1  | 0    |
| CDDP+CPT-11            | 12 | 81.8 | 4.7 (1.0 - 18.9)  | All                    | 12 | 20.0 |
|                        | 5  | 75.0 |                   | CBDCA+PTX              | 5  | 0    |
|                        | 2  | 100  |                   | AMR                    | 2  | 0    |
|                        | 2  | 50.0 |                   | DTX                    | 2  | 0    |
|                        | 2  | 100  |                   | S-1                    | 2  | 100  |
|                        | 1  | 100  |                   | Other platinum doublet | 1  | 0    |
| Other platinum doublet | 27 | 18.5 | 2.2 (0.5 - 23.2)  | All                    | 27 | 11.5 |
|                        | 7  | 0    |                   | CBDCA+PTX              | 7  | 33.3 |
|                        | 6  | 33.3 |                   | S-1                    | 6  | 33.3 |
|                        | 2  | 0    |                   | ADOC                   | 2  | 0    |
|                        | 9  | 22.2 |                   | Other platinum doublet | 9  | 11.1 |
|                        | 1  | 0    |                   | Other multi-drug       | 1  | 0    |
|                        | 2  | 50.0 |                   | Other monotherapy      | 2  | 0    |
| ADOC                   | 56 | 40.0 | 4.2 (0.8 - 101.7) | All                    | 56 | 28.6 |
|                        | 29 | 35.7 |                   | CBDCA+PTX              | 29 | 24.0 |
|                        | 4  | 50.0 |                   | CDDP+CPT-11            | 4  | 50.0 |
|                        | 3  | 66.7 |                   | S-1                    | 3  | 66.7 |
|                        | 2  | 100  |                   | ADOC                   | 2  | 50.0 |

Supplemental Tables for:

Efficacy of second-line chemotherapy in patients with previously treated advanced thymic carcinoma: a retrospective analysis of 191 patients from NEJ023 Study.

Tateishi et al.

|                  |    |      |                  |                        |    |      |
|------------------|----|------|------------------|------------------------|----|------|
|                  | 1  | 100  |                  | CDDP+VP-16             | 1  | 100  |
|                  | 1  | 0    |                  | DTX                    | 1  | 0    |
|                  | 10 | 30.0 |                  | Other platinum doublet | 10 | 22.2 |
|                  | 1  | 100  |                  | Other multi-drug       | 1  | 0    |
|                  | 4  | 20.0 |                  | Other monotherapy      | 5  | 40.0 |
| Other multi-drug | 16 | 40.0 | 7.5 (0.7 - 33.0) | All                    | 16 | 7.1  |
|                  | 3  | 0    |                  | CBDCA+PTX              | 3  | 0    |
|                  | 2  | 50.0 |                  | CDDP+VP-16             | 2  | 50.0 |
|                  | 1  | 0    |                  | CDDP+CPT-11            | 1  | 0    |
|                  | 1  | 100  |                  | S-1                    | 1  | 0    |
|                  | 3  | 66.7 |                  | Other platinum doublet | 3  | 0    |
|                  | 5  | 20.0 |                  | Other multi-drug       | 5  | 0    |
|                  | 1  | 100  |                  | Other monotherapy      | 1  | 0    |
| Monotherapy      | 5  | 40.0 | 4.0 (0.4 - 15.7) | All                    | 5  | 20.0 |
|                  | 1  | 0    |                  | CBDCA+PTX              | 1  | 0    |
|                  | 1  | 0    |                  | DTX                    | 1  | 0    |
|                  | 3  | 66.7 |                  | Other monotherapy      | 3  | 33.3 |

Abbreviations: RR: response rate, CBDCA: carboplatin, PTX: paclitaxel, S-1: tegafur/gimeracil/oteracil, ADOC: adriamycin/cisplatin/vincristine/cyclophosphamide, DTX: docetaxel, AMR: amrubicin, CDDP: cisplatin, VP-16: etoposide, CPT-11: irinotecan

\*The period between the finish date of first line chemotherapy and the start date of second line chemotherapy

Table S3. WHO TNM classification

T-primary tumor

Supplemental Tables for:

Efficacy of second-line chemotherapy in patients with previously treated advanced thymic carcinoma: a retrospective analysis of 191 patients from NEJ023 Study.

Tateishi et al.

---

|    |                                                                                                                           |
|----|---------------------------------------------------------------------------------------------------------------------------|
| TX | Primary tumor cannot be assessed                                                                                          |
| T0 | No evidence of primary tumor                                                                                              |
| T1 | Tumor completely encapsulated                                                                                             |
| T2 | Tumor invades pericapsular connective tissue                                                                              |
| T3 | Tumor invades into neighboring structures, such as pericardium, mediastinal pleura, thoracic wall, great vessels and lung |
| T4 | Tumor with pleural or pericardial dissemination                                                                           |

---

N-regional lymph nodes

---

|    |                                                                                          |
|----|------------------------------------------------------------------------------------------|
| NX | Regional lymph nodes cannot be assessed                                                  |
| N0 | No regional lymph node metastasis                                                        |
| N1 | Metastasis in anterior mediastinal lymph nodes                                           |
| N2 | Metastasis in other intrathoracic lymph nodes excluding anterior mediastinal lymph nodes |
| N3 | Metastasis in scalene and/or supraclavicular lymph nodes                                 |

---

M-distant metastasis

---

|    |                                       |
|----|---------------------------------------|
| MX | Distant metastasis cannot be assessed |
| M0 | No distant metastasis                 |
| M1 | Distant metastasis                    |

---

Stage grouping

---

|          |    |    |    |
|----------|----|----|----|
| Stage I  | T1 | N0 | M0 |
| Stage II | T2 | N0 | M0 |

Supplemental Tables for:

Efficacy of second-line chemotherapy in patients with previously treated advanced thymic carcinoma: a retrospective analysis of 191 patients from NEJ023 Study.

Tateishi et al.

|           |       |       |    |
|-----------|-------|-------|----|
| Stage III | T1    | N1    | M0 |
|           | T2    | N1    | M0 |
|           | T3    | N0,1  | M0 |
| Stage IV  | T4    | Any N | M0 |
|           | Any T | N2,3  | M0 |
|           | Any T | Any N | M1 |

---

Abbreviations: WHO: World Health Organization

Supplemental Tables for:

Efficacy of second-line chemotherapy in patients with previously treated advanced thymic carcinoma: a retrospective analysis of 191 patients from NEJ023 Study. Tateishi et al.

Table S4. Univariate and multivariate analyses for overall survival

| Variants                        | Cut-off                      | n   | mOS [95%CI]      | Univariate          |          | Multivariate        |          |
|---------------------------------|------------------------------|-----|------------------|---------------------|----------|---------------------|----------|
|                                 |                              |     |                  | HR [95%CI]          | <i>p</i> | HR [95%CI]          | <i>p</i> |
| Age (years)                     | <75                          | 170 | 21.7 [16.1-25.7] | 1                   |          |                     |          |
|                                 | ≥75                          | 21  | 28.4 [17.5-41.8] | 0.946 [0.518-1.594] | 0.845    |                     |          |
| Sex                             | Female                       | 54  | 15.0 [7.7-28.4]  | 1                   |          | 1                   |          |
|                                 | Male                         | 137 | 24.1 [18.5-29.5] | 0.674 [0.467-0.991] | 0.045    | 0.691 [0.466-1.046] | 0.080    |
| ECOG PS                         | 2–3                          | 28  | 7.7 [4.2-12.7]   | 1                   |          | 1                   |          |
|                                 | 0–1                          | 148 | 25.7 [21.7-29.6] | 0.342 [0.215-0.569] | <0.001   | 0.359 [0.225-0.599] | <0.001   |
| Histology                       | Other                        | 33  | 17.9 [10.1-25.5] | 1                   |          |                     |          |
|                                 | SQC                          | 135 | 24.1 [18.5-30.2] | 0.629 [0.399-1.034] | 0.067    |                     |          |
|                                 | NEC                          | 23  | 13.7 [7.0-40.4]  | 0.857 [0.451-1.608] | 0.631    |                     |          |
| Masaoka stage                   | IVb                          | 95  | 16.8 [12.5-22.5] | 1                   |          | 1                   |          |
|                                 | IVa                          | 54  | 26.6 [16.9-41.4] | 0.562 [0.367-0.847] | 0.006    | 0.605 [0.386-0.932] | 0.022    |
|                                 | Postoperative recurrence/III | 42  | 31.8 [15.8-40.4] | 0.681 [0.430-1.051] | 0.083    | 0.653 [0.401-1.034] | 0.069    |
| WHO TNM stage                   | IV                           | 150 | 21.4 [16.1-25.5] | 1                   |          |                     |          |
|                                 | Postoperative recurrence/III | 41  | 31.8 [18.5-41.5] | 0.847 [0.538-1.284] | 0.443    |                     |          |
| First-line chemotherapy regimen | Other multi-drug regimen     | 72  | 22.4 [14.1-28.4] | 1                   |          |                     |          |
|                                 | Monotherapy                  | 5   | 42.7 [12.3-70.4] | 0.724 [0.219-1.776] | 0.516    |                     |          |
|                                 | Platinum doublet             | 114 | 21.7 [16.9-29.2] | 0.970 [0.679-1.394] | 0.867    |                     |          |

Abbreviations: mOS; median overall survival, HR; Hazard rate, 95%CI; 95% confidence interval, ECOG; Eastern Cooperative Oncology Group, PS; performance status, WHO; World Health Organization, NEC; neuroendocrine carcinoma, SQC; squamous cell carcinoma
