# Supplementary material
Source: PubMed Central journal article supplement (PMC7160416)

Supplemental Figures for:

Clinical outcomes of second-line chemotherapy in patients with previously treated advanced thymic carcinoma: a retrospective analysis of 191 patients from the NEJ023 study. Running head of the title: Second-line chemotherapy for advanced thymic carcinomas

Takehito Shukuya et al.

**Figure S1.** Flow diagram of patients in this study.

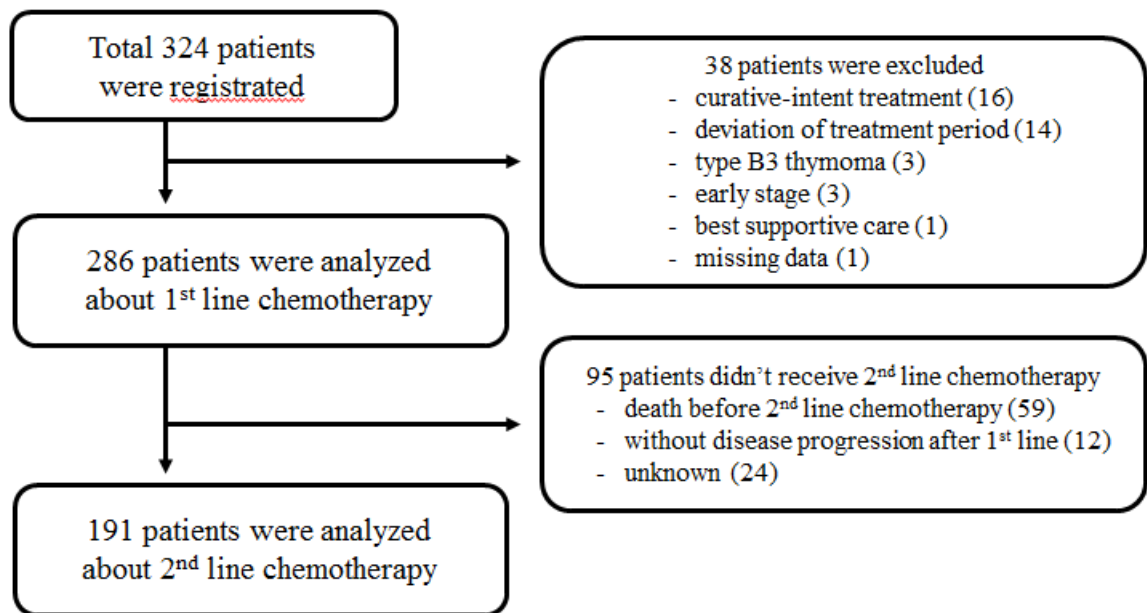

**Figure S2.** Relationship between treatments of third-line or higher chemotherapy and survivals

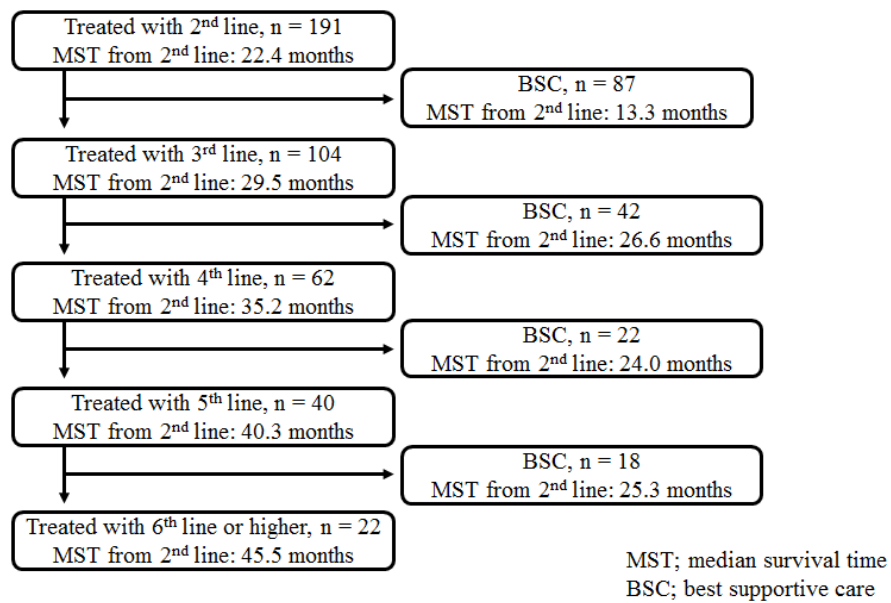

Supplement: ONCO-25-e668-s002.pdf [file ONCO-25-e668-s002.pdf]
